# Supplementary material for: The Associations of Dietary Iron, Zinc and Magnesium with Metabolic Syndrome in China’s Mega Cities
Source: PubMed Central journal article supplement (PMC7146276; doi:10.3390/nu12030659), 2020-02-28
Supplement: nutrients-12-00659-s001.pdf [file nutrients-12-00659-s001.pdf]

**Supplement Table 1.** Partial correlation coefficients between dietary iron intake and serum ferritin in the participants from CNHS and SDHS<sup>1</sup>

| Dietary intake | serum ferritin |
|----------------|----------------|
| Total Iron     | 0.05*          |
| Haem Iron      | -0.01          |
| Nonhaem Iron   | 0.06*          |

<sup>1</sup> Correlations were adjusted for age and sex.

\* Coefficients are significant at the 0.05 level.

**Supplement Table 2.** ORs (95% CI) for MetS according to the quartiles of dietary iron, zinc and magnesium intakes (mg/day) in male and female participants from CNHS and SDHS<sup>1</sup>.

|                           |           | Quartiles of Dietary Iron, Zinc or Magnesium (mg/day), |                  |                  |                  | ORs (95% CI)              |
|---------------------------|-----------|--------------------------------------------------------|------------------|------------------|------------------|---------------------------|
|                           |           | Q1                                                     | Q2               | Q3               | Q4               | <i>p</i> -Value for Trend |
| <b>Male</b>               |           |                                                        |                  |                  |                  |                           |
| n                         |           | 596                                                    | 597              | 597              | 596              |                           |
| <b>Total Iron</b>         |           |                                                        |                  |                  |                  |                           |
|                           |           | <14.12                                                 | (14.12, 17.75)   | (17.75, 22.59)   | ≥22.59           |                           |
| Model1                    | Reference |                                                        | 1.11(0.86, 1.43) | 1.39(1.09, 1.78) | 1.32(1.03, 1.69) | 0.03                      |
| Model2                    | Reference |                                                        | 1.05(0.80, 1.39) | 1.26(0.94, 1.70) | 1.21(0.86, 1.70) | 0.41                      |
| Model3                    | Reference |                                                        | 1.20(0.88, 1.65) | 1.56(1.07, 2.28) | 1.57(1.02, 2.41) | 0.12                      |
| <b>Haem Iron</b>          |           |                                                        |                  |                  |                  |                           |
|                           |           | <0.66                                                  | (0.66, 1.15)     | (1.15, 1.74)     | ≥1.74            |                           |
| Model1                    | Reference |                                                        | 0.97(0.76, 1.24) | 0.92(0.72, 1.17) | 0.92(0.72, 1.17) | 0.87                      |
| Model2                    | Reference |                                                        | 0.89(0.68, 1.15) | 0.74(0.56, 0.97) | 0.75(0.57, 1.00) | 0.11                      |
| Model3                    | Reference |                                                        | 1.02(0.78, 1.35) | 0.92(0.68, 1.24) | 0.98(0.70, 1.36) | 0.88                      |
| <b>Nonhaem Iron</b>       |           |                                                        |                  |                  |                  |                           |
|                           |           | <13.15                                                 | (13.15, 16.43)   | (16.43, 20.92)   | ≥20.92           |                           |
| Model1                    | Reference |                                                        | 1.33(1.04, 1.72) | 1.47(1.14, 1.89) | 1.38(1.07, 1.77) | 0.02                      |
| Model2                    | Reference |                                                        | 1.29(0.98, 1.70) | 1.38(1.02, 1.85) | 1.27(0.90, 1.80) | 0.17                      |
| Model3                    | Reference |                                                        | 1.49(1.09, 2.04) | 1.60(1.10, 2.32) | 1.50(0.98, 2.30) | 0.06                      |
| <b>Zinc</b>               |           |                                                        |                  |                  |                  |                           |
|                           |           | <7.50                                                  | (7.50, 9.39)     | (9.39, 11.94)    | ≥11.94           |                           |
| Model1                    | Reference |                                                        | 0.84(0.66, 1.07) | 0.86(0.67, 1.09) | 0.84(0.66, 1.07) | 0.42                      |
| Model2                    | Reference |                                                        | 0.78(0.60, 1.01) | 0.65(0.49, 0.88) | 0.62(0.45, 0.87) | 0.02                      |
| Model3                    | Reference |                                                        | 0.66(0.50, 0.88) | 0.47(0.33, 0.66) | 0.42(0.28, 0.62) | <0.01                     |
| <b>Magnesium (mg/day)</b> |           |                                                        |                  |                  |                  |                           |
|                           |           | <196.93                                                | (196.93, 250.88) | (250.88, 323.64) | ≥323.64          |                           |
| Model1                    | Reference |                                                        | 1.00(0.78, 1.28) | 1.38(1.08, 1.76) | 1.21(0.94, 1.55) | 0.02                      |
| Model2                    | Reference |                                                        | 0.91(0.70, 1.20) | 1.20(0.90, 1.60) | 1.10(0.78, 1.54) | 0.26                      |
| Model3                    | Reference |                                                        | 0.99(0.73, 1.35) | 1.36(0.94, 1.96) | 1.31(0.85, 2.02) | 0.18                      |

| <b>Female</b>             |           |                  |                  |                  |       |
|---------------------------|-----------|------------------|------------------|------------------|-------|
| n                         | 735       | 734              | 734              | 734              |       |
| <b>Total Iron</b>         |           |                  |                  |                  |       |
|                           | <12.42    | (12.42, 15.63)   | (15.63, 19.96)   | $\geq$ 19.96     |       |
| Model1                    | Reference | 1.26(1.03, 1.56) | 1.26(1.03, 1.56) | 1.30(1.05, 1.60) | 0.05  |
| Model2                    | Reference | 1.28(1.01, 1.62) | 1.18(0.92, 1.52) | 1.34(0.99, 1.80) | 0.16  |
| Model3                    | Reference | 1.21(0.91, 1.61) | 1.17(0.84, 1.63) | 1.43(0.98, 2.09) | 0.23  |
| <b>Haem Iron</b>          |           |                  |                  |                  |       |
|                           | <0.58     | (0.58, 0.98)     | (0.98, 1.55)     | $\geq$ 1.55      |       |
| Model1                    | Reference | 0.86(0.70, 1.05) | 0.68(0.55, 0.83) | 0.59(0.48, 0.73) | <0.01 |
| Model2                    | Reference | 0.82(0.66, 1.02) | 0.68(0.54, 0.86) | 0.61(0.48, 0.78) | <0.01 |
| Model3                    | Reference | 0.82(0.66, 1.04) | 0.69(0.53, 0.89) | 0.63(0.47, 0.84) | 0.01  |
| <b>Nonhaem Iron</b>       |           |                  |                  |                  |       |
|                           | <11.57    | (11.57, 14.51)   | (14.51, 18.50)   | $\geq$ 18.50     |       |
| Model1                    | Reference | 1.28(1.04, 1.58) | 1.41(1.14, 1.74) | 1.37(1.11, 1.69) | 0.01  |
| Model2                    | Reference | 1.34(1.06, 1.69) | 1.38(1.08, 1.78) | 1.48(1.10, 1.99) | 0.03  |
| Model3                    | Reference | 1.30(0.98, 1.72) | 1.42(1.03, 1.96) | 1.62(1.12, 2.33) | 0.08  |
| <b>Zinc</b>               |           |                  |                  |                  |       |
|                           | <6.47     | (6.47, 8.08)     | (8.08, 10.29)    | $\geq$ 10.29     |       |
| Model1                    | Reference | 1.03(0.84, 1.27) | 0.96(0.78, 1.18) | 0.89(0.72, 1.10) | 0.57  |
| Model2                    | Reference | 1.00(0.80, 1.26) | 0.87(0.68, 1.11) | 0.75(0.56, 1.01) | 0.16  |
| Model3                    | Reference | 0.82(0.64, 1.06) | 0.63(0.46, 0.85) | 0.52(0.36, 0.74) | <0.01 |
| <b>Magnesium (mg/day)</b> |           |                  |                  |                  |       |
|                           | <173.85   | (173.85, 224.70) | (224.70, 289.78) | $\geq$ 289.78    |       |
| Model1                    | Reference | 1.24(1.00, 1.53) | 1.42(1.15, 1.75) | 1.36(1.10, 1.67) | 0.01  |
| Model2                    | Reference | 1.23(0.97, 1.55) | 1.33(1.03, 1.70) | 1.20(0.89, 1.62) | 0.15  |
| Model3                    | Reference | 1.28(0.97, 1.71) | 1.54(1.10, 2.15) | 1.45(0.98, 2.16) | 0.10  |

**Supplement Table 3.** ORs (95% CI) for MetS according to the quartiles of dietary iron, zinc and magnesium intakes (mg/day) in male and female participants from CNHS and SDHS, stratified by food sources.

| <b>Quartiles of Dietary Iron, Zinc or Magnesium (mg/day), ORs (95% CI)</b> |           |                  |                  |                  |                           |
|----------------------------------------------------------------------------|-----------|------------------|------------------|------------------|---------------------------|
|                                                                            | Q1        | Q2               | Q3               | Q4               | <i>p</i> -Value for Trend |
| <b>Male</b>                                                                |           |                  |                  |                  |                           |
| n                                                                          | 596       | 597              | 597              | 596              |                           |
| <b>Dietary Source of Red Meat</b>                                          |           |                  |                  |                  |                           |
| <b>Iron</b>                                                                |           |                  |                  |                  |                           |
|                                                                            | <0.43     | (0.43, 1.06)     | (1.06, 1.89)     | $\geq$ 1.89      |                           |
| Model1                                                                     | Reference | 0.99(0.78, 1.26) | 0.80(0.63, 1.02) | 0.81(0.63, 1.03) | 0.13                      |
| Model2                                                                     | Reference | 0.91(0.71, 1.18) | 0.79(0.61, 1.02) | 0.75(0.57, 0.97) | 0.12                      |

|                                              |        |           |                  |                  |                  |       |
|----------------------------------------------|--------|-----------|------------------|------------------|------------------|-------|
|                                              | Model3 | Reference | 1.10(0.66, 1.82) | 1.12(0.59, 2.15) | 1.29(0.60, 2.77) | 0.91  |
| <b>Zinc</b>                                  |        |           |                  |                  |                  |       |
|                                              |        | <0.55     | (0.55, 1.37)     | (1.37, 2.50)     | $\geq 2.50$      |       |
|                                              | Model1 | Reference | 0.93(0.73, 1.18) | 0.83(0.65, 1.06) | 0.77(0.60, 0.99) | 0.17  |
|                                              | Model2 | Reference | 0.85(0.66, 1.10) | 0.81(0.63, 1.05) | 0.70(0.53, 0.92) | 0.08  |
|                                              | Model3 | Reference | 0.75(0.36, 1.58) | 1.03(0.43, 2.48) | 0.92(0.35, 2.43) | 0.46  |
| <b>Magnesium</b>                             |        |           |                  |                  |                  |       |
|                                              |        | <4.03     | (4.03, 9.99)     | (9.99, 17.67)    | $\geq 17.67$     |       |
|                                              | Model1 | Reference | 0.98(0.77, 1.24) | 0.83(0.65, 1.06) | 0.75(0.59, 0.97) | 0.08  |
|                                              | Model2 | Reference | 0.94(0.73, 1.22) | 0.75(0.58, 0.98) | 0.70(0.53, 0.92) | 0.03  |
|                                              | Model3 | Reference | 1.09(0.54, 2.20) | 0.67(0.29, 1.53) | 0.59(0.24, 1.47) | 0.16  |
| <b>Dietary Source of Cereal and Potato</b>   |        |           |                  |                  |                  |       |
| <b>Iron</b>                                  |        |           |                  |                  |                  |       |
|                                              |        | <5.06     | (5.06, 6.73)     | (6.73, 8.98)     | $\geq 8.98$      |       |
|                                              | Model1 | Reference | 1.09(0.85, 1.41) | 1.50(1.17, 1.92) | 1.50(1.17, 1.92) | <0.01 |
|                                              | Model2 | Reference | 1.24(0.94, 1.62) | 1.66(1.27, 2.18) | 1.87(1.39, 2.52) | <0.01 |
|                                              | Model3 | Reference | 1.19(0.82, 1.72) | 1.34(0.87, 2.07) | 1.34(0.80, 2.22) | 0.61  |
| <b>Zinc</b>                                  |        |           |                  |                  |                  |       |
|                                              |        | <2.87     | (2.87, 3.77)     | (3.77, 4.84)     | $\geq 4.84$      |       |
|                                              | Model1 | Reference | 0.96(0.75, 1.24) | 1.14(0.89, 1.46) | 1.12(0.88, 1.43) | 0.45  |
|                                              | Model2 | Reference | 0.97(0.74, 1.26) | 1.23(0.94, 1.61) | 1.33(0.98, 1.79) | 0.09  |
|                                              | Model3 | Reference | 0.61(0.44, 0.86) | 0.57(0.39, 0.84) | 0.47(0.29, 0.74) | 0.01  |
| <b>Magnesium</b>                             |        |           |                  |                  |                  |       |
|                                              |        | <69.08    | (69.08, 96.83)   | (96.83, 135.73)  | $\geq 135.73$    |       |
|                                              | Model1 | Reference | 1.08(0.83, 1.40) | 1.62(1.26, 2.08) | 1.77(1.38, 2.27) | <0.01 |
|                                              | Model2 | Reference | 1.20(0.91, 1.58) | 1.81(1.38, 2.38) | 2.29(1.69, 3.09) | <0.01 |
|                                              | Model3 | Reference | 1.42(0.98, 2.04) | 2.22(1.45, 3.39) | 3.03(1.86, 4.95) | <0.01 |
| <b>Dietary Source of Vegetable and Fruit</b> |        |           |                  |                  |                  |       |
| <b>Iron</b>                                  |        |           |                  |                  |                  |       |
|                                              |        | <1.95     | (1.95, 3.27)     | (3.27, 5.14)     | $\geq 5.14$      |       |
|                                              | Model1 | Reference | 0.80(0.58, 1.11) | 0.75(0.55, 1.04) | 0.62(0.45, 0.86) | 0.04  |
|                                              | Model2 | Reference | 0.77(0.55, 1.07) | 0.69(0.49, 0.97) | 0.58(0.40, 0.83) | 0.02  |
|                                              | Model3 | Reference | 0.96(0.57, 1.64) | 0.90(0.46, 1.74) | 0.66(0.31, 1.42) | 0.56  |
| <b>Zinc</b>                                  |        |           |                  |                  |                  |       |
|                                              |        | <0.82     | (0.82, 1.39)     | (1.39, 2.39)     | $\geq 2.39$      |       |
|                                              | Model1 | Reference | 0.92(0.72, 1.17) | 0.94(0.74, 1.20) | 0.86(0.67, 1.10) | 0.68  |
|                                              | Model2 | Reference | 0.87(0.68, 1.13) | 0.86(0.67, 1.12) | 0.74(0.56, 0.97) | 0.18  |
|                                              | Model3 | Reference | 1.57(0.93, 2.63) | 2.56(1.34, 4.90) | 2.35(1.05, 5.24) | 0.04  |
| <b>Magnesium</b>                             |        |           |                  |                  |                  |       |
|                                              |        | <38.60    | (38.60, 63.11)   | (63.11, 104.58)  | $\geq 104.58$    |       |
|                                              | Model1 | Reference | 0.90(0.71, 1.15) | 0.83(0.65, 1.07) | 0.90(0.70, 1.15) | 0.54  |
|                                              | Model2 | Reference | 0.83(0.64, 1.07) | 0.76(0.58, 0.98) | 0.76(0.58, 0.99) | 0.13  |
|                                              | Model3 | Reference | 0.47(0.28, 0.78) | 0.30(0.16, 0.57) | 0.35(0.16, 0.75) | <0.01 |

| <b>Female</b>                                |           |                  |                  |                  |               |       |
|----------------------------------------------|-----------|------------------|------------------|------------------|---------------|-------|
| n                                            |           | 735              | 734              | 734              | 734           |       |
| <b>Dietary Source of Red Meat</b>            |           |                  |                  |                  |               |       |
| <b>Iron</b>                                  |           |                  |                  |                  |               |       |
|                                              |           | <0.32            | (0.32, 0.80)     | (0.80, 1.50)     | $\geq$ 1.50   |       |
| Model1                                       | Reference | 0.74(0.60, 0.91) | 0.72(0.58, 0.88) | 0.65(0.53, 0.80) |               | <0.01 |
| Model2                                       | Reference | 0.77(0.62, 0.96) | 0.78(0.63, 0.97) | 0.75(0.60, 0.95) |               | 0.04  |
| Model3                                       | Reference | 1.06(0.54, 2.07) | 1.16(0.55, 2.43) | 1.28(0.56, 2.91) |               | 0.91  |
| <b>Zinc</b>                                  |           |                  |                  |                  |               |       |
|                                              |           | <0.40            | (0.40, 1.06)     | (1.06, 1.97)     | $\geq$ 1.97   |       |
| Model1                                       | Reference | 0.75(0.61, 0.92) | 0.69(0.56, 0.85) | 0.63(0.51, 0.78) |               | <0.01 |
| Model2                                       | Reference | 0.75(0.60, 0.93) | 0.77(0.62, 0.97) | 0.73(0.58, 0.91) |               | 0.02  |
| Model3                                       | Reference | 0.51(0.24, 1.11) | 0.53(0.23, 1.24) | 0.51(0.20, 1.28) |               | 0.40  |
| <b>Magnesium</b>                             |           |                  |                  |                  |               |       |
|                                              |           | <2.86            | (2.86, 7.85)     | (7.85, 13.67)    | $\geq$ 13.67  |       |
| Model1                                       | Reference | 0.79(0.64, 0.97) | 0.73(0.60, 0.90) | 0.62(0.51, 0.77) |               | <0.01 |
| Model2                                       | Reference | 0.82(0.66, 1.02) | 0.80(0.64, 1.00) | 0.74(0.58, 0.93) |               | 0.06  |
| Model3                                       | Reference | 1.42(0.77, 2.61) | 1.29(0.64, 2.60) | 1.12(0.52, 2.43) |               | 0.55  |
| <b>Dietary Source of Cereal and Potato</b>   |           |                  |                  |                  |               |       |
| <b>Iron</b>                                  |           |                  |                  |                  |               |       |
|                                              |           | <4.05            | (4.05, 5.57)     | (5.57, 7.49)     | $\geq$ 7.49   |       |
| Model1                                       | Reference | 1.23(0.99, 1.52) | 1.72(1.39, 2.12) | 1.98(1.60, 2.45) |               | <0.01 |
| Model2                                       | Reference | 1.22(0.97, 1.54) | 1.76(1.39, 2.23) | 2.19(1.70, 2.84) |               | <0.01 |
| Model3                                       | Reference | 1.22(0.89, 1.68) | 1.41(0.94, 2.10) | 1.39(0.88, 2.21) |               | 0.42  |
| <b>Zinc</b>                                  |           |                  |                  |                  |               |       |
|                                              |           | <2.34            | (2.34, 3.08)     | (3.08, 4.04)     | $\geq$ 4.04   |       |
| Model1                                       | Reference | 1.13(0.91, 1.40) | 1.38(1.12, 1.70) | 1.60(1.30, 1.97) |               | <0.01 |
| Model2                                       | Reference | 1.04(0.83, 1.31) | 1.35(1.07, 1.71) | 1.78(1.37, 2.31) |               | <0.01 |
| Model3                                       | Reference | 0.73(0.55, 0.98) | 0.67(0.48, 0.95) | 0.66(0.44, 1.01) |               | 0.13  |
| <b>Magnesium</b>                             |           |                  |                  |                  |               |       |
|                                              |           | <58.17           | (58.17, 83.17)   | (83.17, 118.28)  | $\geq$ 118.28 |       |
| Model1                                       | Reference | 1.13(0.91, 1.41) | 1.73(1.40, 2.14) | 2.26(1.83, 2.80) |               | <0.01 |
| Model2                                       | Reference | 1.14(0.90, 1.45) | 1.79(1.42, 2.27) | 2.53(1.95, 3.28) |               | <0.01 |
| Model3                                       | Reference | 1.19(0.88, 1.62) | 1.81(1.24, 2.62) | 2.59(1.67, 4.00) |               | <0.01 |
| <b>Dietary Source of Vegetable and Fruit</b> |           |                  |                  |                  |               |       |
| <b>Iron</b>                                  |           |                  |                  |                  |               |       |
|                                              |           | <1.97            | (1.97, 3.17)     | (3.17, 4.88)     | $\geq$ 4.88   |       |
| Model1                                       | Reference | 0.92(0.70, 1.20) | 0.87(0.67, 1.15) | 0.95(0.73, 1.25) |               | 0.80  |
| Model2                                       | Reference | 0.87(0.65, 1.17) | 0.80(0.59, 1.08) | 0.86(0.62, 1.17) |               | 0.54  |
| Model3                                       | Reference | 0.89(0.58, 1.38) | 0.81(0.47, 1.39) | 0.81(0.43, 1.54) |               | 0.90  |
| <b>Zinc</b>                                  |           |                  |                  |                  |               |       |
|                                              |           | <0.80            | (0.80, 1.33)     | (1.33, 2.26)     | $\geq$ 2.26   |       |
| Model1                                       | Reference | 1.09(0.88, 1.33) | 1.08(0.88, 1.33) | 0.86(0.69, 1.06) |               | 0.09  |
| Model2                                       | Reference | 1.00(0.80, 1.25) | 0.97(0.77, 1.22) | 0.65(0.51, 0.82) |               | <0.01 |

|                  |           |                  |                  |                  |      |
|------------------|-----------|------------------|------------------|------------------|------|
| Model3           | Reference | 0.88(0.59, 1.31) | 0.74(0.43, 1.24) | 0.68(0.35, 1.33) | 0.68 |
| <b>Magnesium</b> |           |                  |                  |                  |      |
|                  | <38.60    | (38.60, 63.55)   | (63.55, 99.63)   | ≥99.63           |      |
| Model1           | Reference | 1.13(0.92, 1.39) | 0.98(0.80, 1.21) | 1.04(0.85, 1.29) | 0.56 |
| Model2           | Reference | 0.99(0.79, 1.25) | 0.89(0.70, 1.12) | 0.81(0.64, 1.03) | 0.23 |
| Model3           | Reference | 1.09(0.72, 1.65) | 1.28(0.76, 2.15) | 1.63(0.89, 2.99) | 0.38 |

---
